# Supplementary material for: Improving the performance of supported ionic liquid phase (SILP) catalysts for the ultra-low-temperature water–gas shift reaction using metal salt additives
Source: Royal Society of Chemistry journal article supplement (doi:10.1039/c9gc02153a), 2019-01-01
Supplement: c9gc02153a1.pdf [file c9gc02153a1.pdf]

## Supporting Information

### **Improving the Performance of Supported Ionic Liquid Phase (SILP) catalysts for the Ultra-Low-Temperature Water-Gas Shift Reaction Using Metal Salt Additives**

Patrick Wolf<sup>1</sup>, Manfred Aubermann<sup>1</sup>, Moritz Wolf<sup>1</sup>, Tanja Bauer<sup>2</sup>, Dominik Blaumeiser<sup>2</sup>, Robert Stepic<sup>3,4</sup>, Christian R. Wick<sup>3</sup>, David M. Smith<sup>4</sup>, Ana-Sunčana Smith<sup>3,4</sup>, Peter Wasserscheid<sup>1</sup>, Jörg Libuda<sup>2</sup>, and Marco Haumann<sup>1\*</sup>

<sup>1</sup>Lehrstuhl für Chemische Reaktionstechnik, Friedrich-Alexander-Universität Erlangen-Nürnberg, Egerlandstraße 3, D-91058 Erlangen, Germany

<sup>2</sup>Lehrstuhl für Katalytische Grenzflächenforschung, Friedrich-Alexander-Universität Erlangen-Nürnberg, Egerlandstraße 3, D-91058 Erlangen, Germany

<sup>3</sup>PULS Gruppe, Department Physik and Interdisziplinäres Zentrum für Nanostrukturierte Filme IZNF, Friedrich-Alexander-Universität Erlangen-Nürnberg, Cauerstr. 3, D-91058 Erlangen, Germany

<sup>4</sup>Group for Computational Life Sciences, Division of Physical Chemistry, Ruđer Bošković Institute, Bijenička cesta 54, HR-10000 Zagreb, Croatia

Corresponding author: marco.haumann@fau.de

## Chemisorption

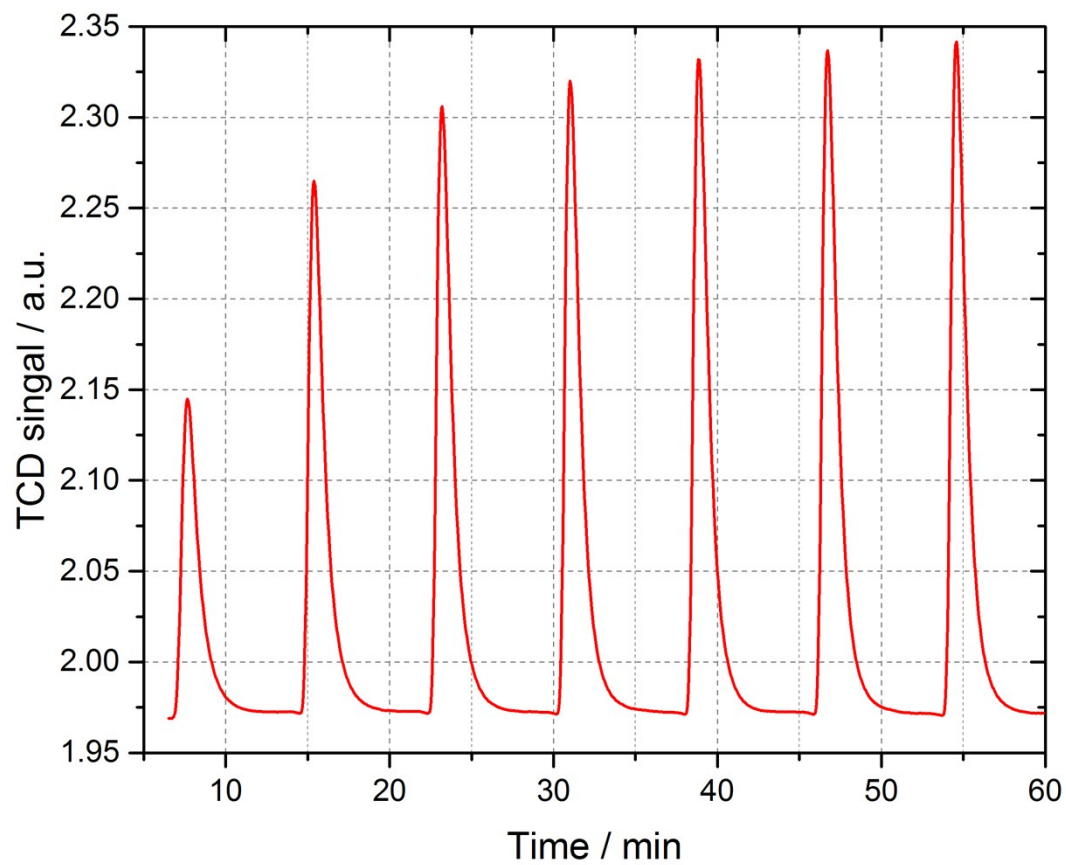

**Figure S1.** Exemplary pulse chemisorption experiment with a benchmark SILP catalyst system (no dopants added), TCD signal of eluting CO plotted over time,  $T=130\text{ }^{\circ}\text{C}$ ,  $\dot{V}_{He} = 20\text{ ml}_N\text{ min}^{-1}$ ,  $V_{CO\text{ pulses}} = 0.5\text{ ml}_N$ ,  $m_{\text{sample}} = 0.312\text{ g}$ .

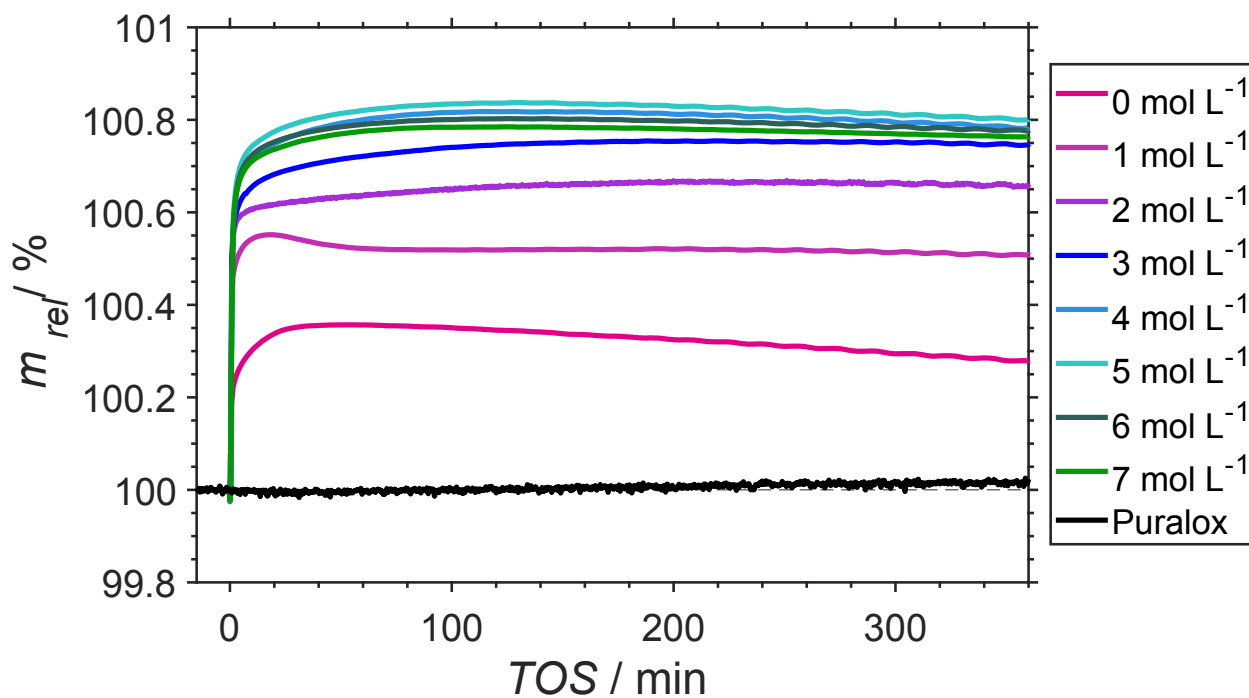

**Figure S2.** Weight change relative to the mass of dry SILP catalysts with various molarities of additive CuCl as observed during CO chemisorption experiments at 130 °C and 1 bar in a XEMIS sorption analyzer. Ru-dimer added to ionic liquid.

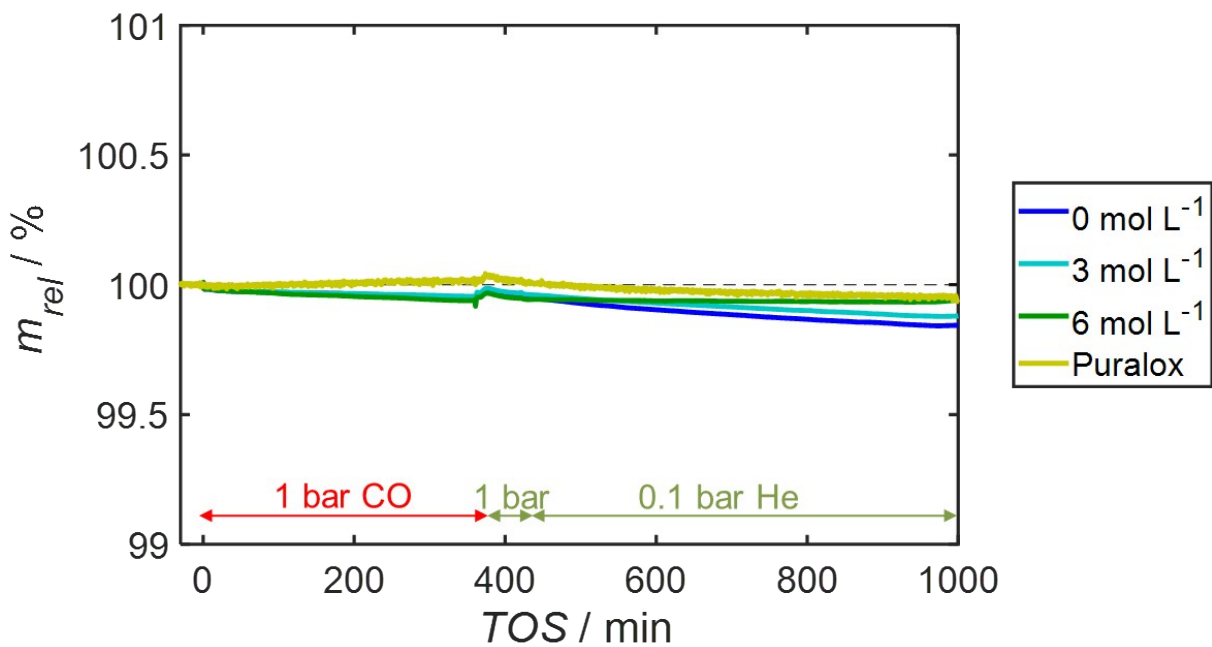

**Figure S3.** Weight change relative to the mass of dry SILP with various molarities of additive CuCl as observed during CO chemisorption experiments at 130 °C and 1 bar in a XEMIS sorption analyzer. No Ru-dimer added to ionic liquid.

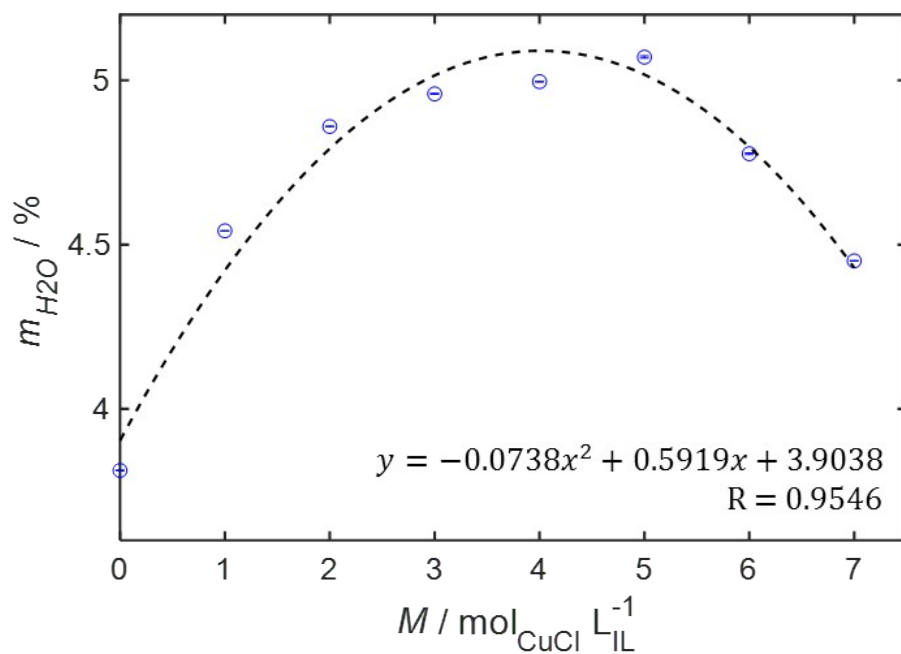

**Figure S4.** Fraction of adsorbed water relative to the mass of the dry SILP catalysts as a function of the molarity of the additive CuCl in the ionic liquid as obtained by means of high-resolution thermogravimetry in a XEMIS sorption analyzer (circles) with a second order polynomial fit (dashed).

## Continuous gas-phase reactor setup

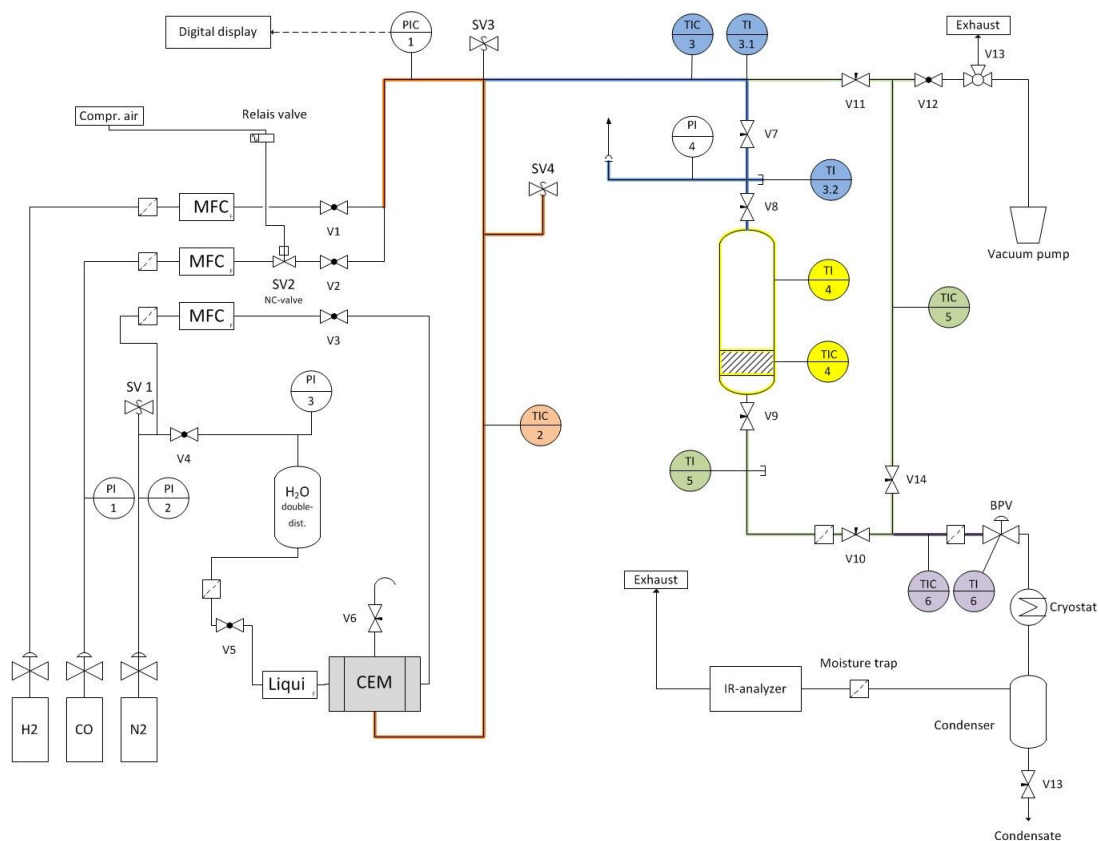

**Figure S5.** Flow scheme of the continuous fixed-bed reactor for the catalytic evaluation of the different samples. Red: gas dosing and mixing section, blue: upstream section, yellow: fixed-bed reactor, green: downstream/bypass section, purple: pressure regulation.

# DRIFTS setup

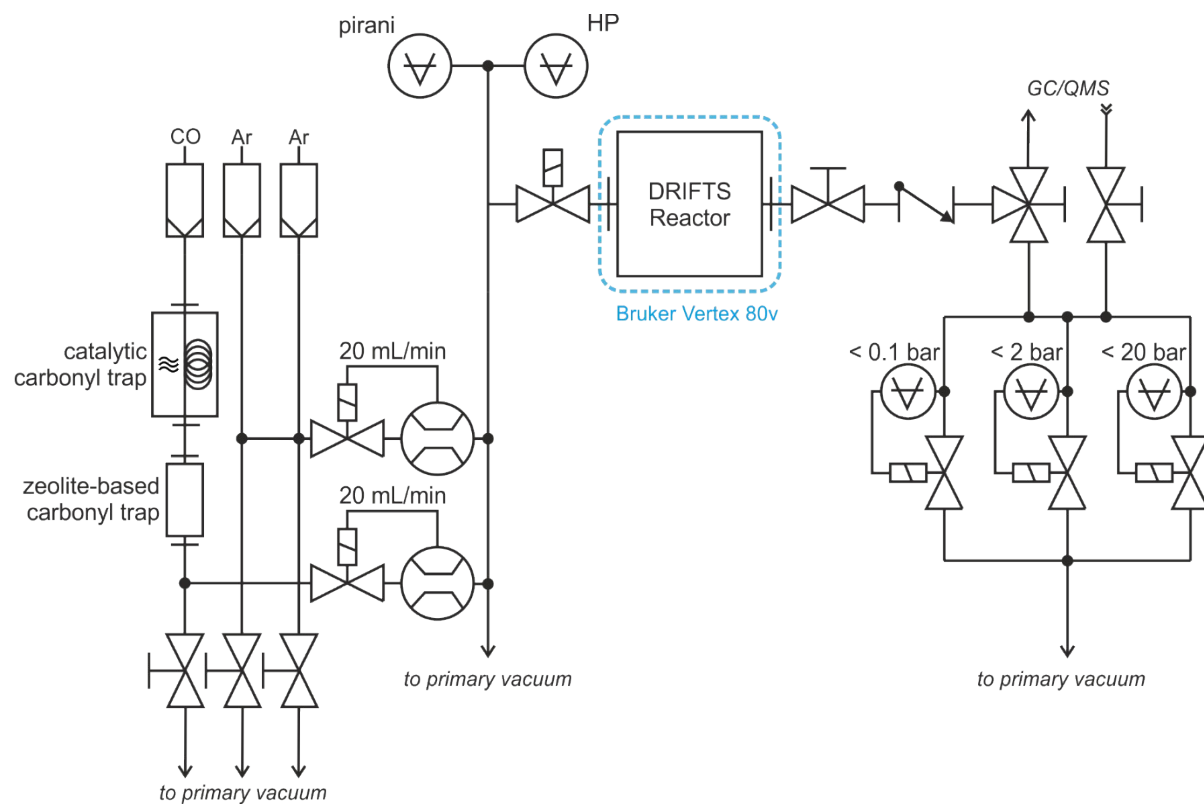

**Figure S6.** Selected parts of the DRIFTS setup.
